# Supplementary material
Source: PubMed Central journal article supplement (PMC1735938)
Supplement: jmedgene_42_10_774__1.pdf [file jmedgene_42_10_774__1.pdf]

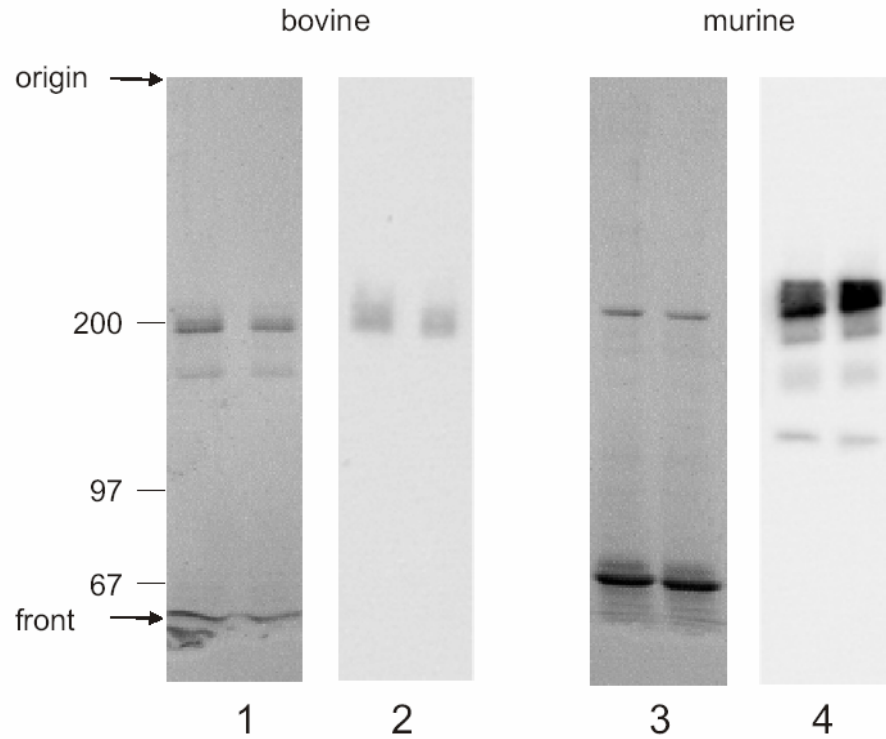

**Figure 1: Analysis of the species specificity of the matrilin-3 antibody used in the present study.** Matrilin-3 was either extracted and purified from fetal bovine cartilage (1, 2) or purified from cell culture supernatants of transfected EBNA-293 cells expressing murine matrilin-3 (3, 4). Two concentrations of each preparation were separated by SDS-PAGE and the gels stained with Coomassie (1, 3) or processed for immunoblotting (2, 4). Mobilities of the protein standards are indicated in kDa.

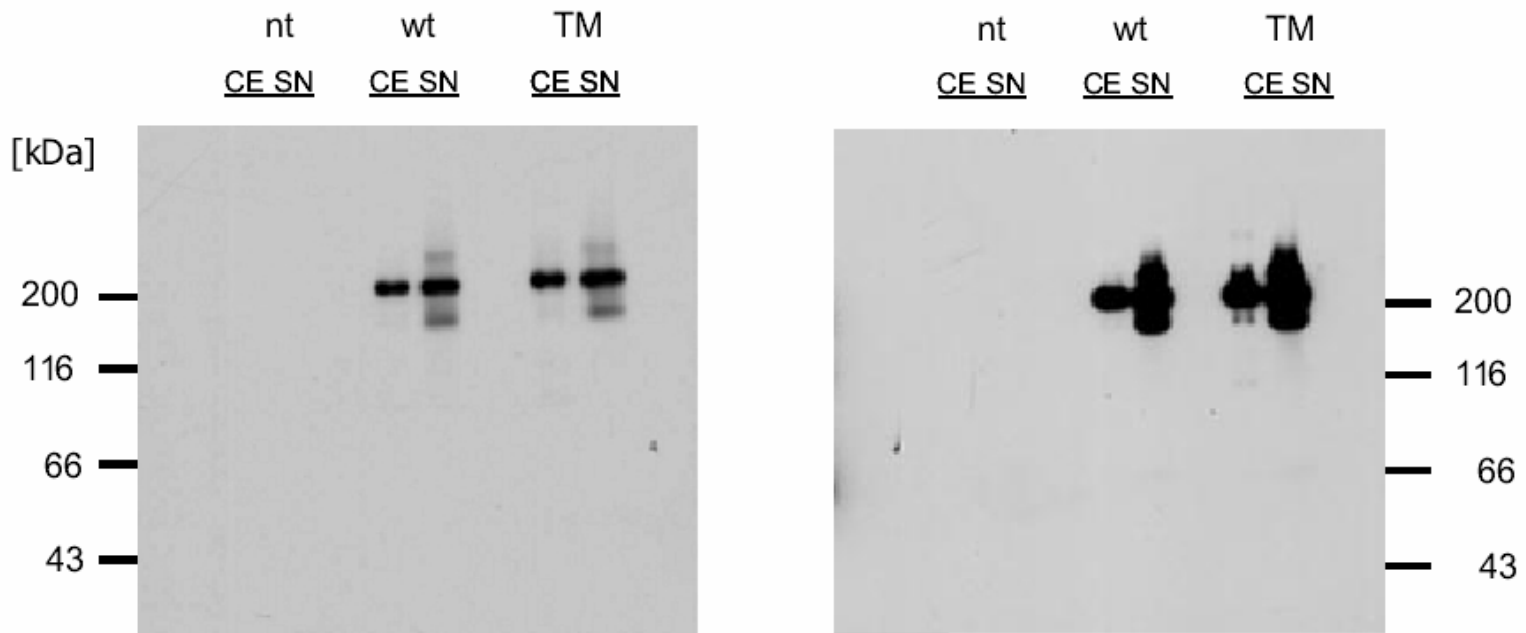

**Figure 2: Immunoblot analysis of transfected primary chondrocytes.** Cell extracts (CE) and cell culture supernatants (SN) were harvested 3 days after transfection and submitted to SDS-PAGE under non-reducing conditions. Immunoblot analysis was performed using a matrilin-3 specific antibody. Similar amounts of total protein were loaded for non transfected cells and cells transfected with the constructs wt (wildtype) and TM (T303M mutant). Even after prolonged exposure times (right panel) no endogenous matrilin-3 was detected in non transfected (nt) cells. Mobilities of the protein standards are indicated in kDa.
